# Supplementary material for: Recognized Obstructive Sleep Apnea is Associated With Improved In‐Hospital Outcomes After ST Elevation Myocardial Infarction
Source: PubMed Central journal article supplement — J Am Heart Assoc. 2017 Jul 20;6(7):e006133. doi: 10.1161/JAHA.117.006133 (PMC5586313; doi:10.1161/jaha.117.006133), 2017-07-20
Supplement: JAH3-6-e006133-s001.pdf [file JAH3-6-e006133-s001.pdf]

# **Supplemental Material**

**Table S1.** International Classification of Diseases, Ninth Edition, Clinical Modification and Clinical Classifications Software Codes Used to Identify ST elevation myocardial infarction, comorbidities, procedures and outcomes.

| <b>Variable</b>                    | <b>Source</b> | <b>Code(s)</b>                       |
|------------------------------------|---------------|--------------------------------------|
| ST elevation myocardial infarction | ICD-9-CM      | 410.01 to 410.61,<br>410.81          |
| Anterior myocardial infarction     | ICD-9-CM      | 410.0, 410.1                         |
| Inferior myocardial infarction     | ICD-9-CM      | 410.2, 410.3                         |
| Dyslipidemia                       | CCS           | 53                                   |
| Coronary artery disease            | ICD-9-CM      | 414.00 – 414.07                      |
| Obstructive Sleep Apnea            | ICD-9-CM      | 327.23                               |
| Diagnostic angiography             | CCS           | 47                                   |
| Thrombolytics                      | CCS           | 46                                   |
| Percutaneous intervention          | ICD-9-CM      | 00.66, 36.01, 36.05,<br>36.06, 37.07 |
| Coronary artery bypass grafting    | CCS           | 44                                   |
| In-hospital cardiac arrest         | ICD-9-CM      | 99.60, 99.63                         |

CCS = Clinical Classification Software; ICD-9-CM = International Classification of Diseases, Ninth Edition, Clinical Modification.
